# Supplementary material for: Cutaneous Localization of Classic Hodgkin Lymphoma Associated with Mycosis Fungoides: Report of a Rare Event and Review of the Literature
Source: MDPI journal article supplement (doi:10.3390/life11101069), 2021-10-11
Supplement: s1 [file s1]

**Table S1.** Differential diagnoses

|            | Clinical Presentation                                        | Extra-cutaneous Sites                                                                          | Histology                                                                                                                                                                    | IHC                                                                                                                                                 | Genetic Profile                                          | Outcome                                                                                      |
|------------|--------------------------------------------------------------|------------------------------------------------------------------------------------------------|------------------------------------------------------------------------------------------------------------------------------------------------------------------------------|-----------------------------------------------------------------------------------------------------------------------------------------------------|----------------------------------------------------------|----------------------------------------------------------------------------------------------|
|            |                                                              |                                                                                                |                                                                                                                                                                              | CD3+ CD2+<br>CD5+ CD7-<br>CD4+ (more often)<br>CD8- (more often)<br>TCR beta+<br>TCR gamma- (more often)<br>CLA+ CD30+/-                            | TCR+                                                     | Slow progression over many years; outcome depends on clinical stage                          |
|            |                                                              | Lymph nodes and other extra-cutaneous sites involved. Cutaneous cHL occurs in advanced disease | Large-sized cells with Hodgkin and RSC morphology within inflammatory background                                                                                             | CD30+<br>CD15+/-<br>MUM1+<br>PAX5+ weak<br>CD20- or variably +<br>CD79alpha- or variably+<br>LCA-<br>T-cell antigens may be aberrantly +<br>EBER+/- | IGH+<br>TCR-                                             | Poor                                                                                         |
|            | Usually skin-limited disease; often solitary ulcerated tumor | Rare (10% of cases in regional lymph nodes)                                                    | Cohesive sheets of cells with anaplastic, pleomorphic or immunoblastic features; sometimes inflammatory background (pyogenic variant); epidermotropism often in DUSP22-IRF4+ | CD4+;<br>CD4-CD8+;<br>CD4+CD8+: or null;<br>perforin+<br>TIA1+ Granz. B+<br>CD30+<br>CD15+ (40%)<br>MUM1+<br>EMA- ALK-<br>PAX5- EBER-               | TCR+<br><br>DUSP22-IRF4+ (25%)                           | Favorable                                                                                    |
| <b>LyP</b> | Skin-limited disease; multiple necrotic papules and nodules  | absent                                                                                         | Different histological patterns:<br>Type A: sparse atypical large CD30+ cells within inflammatory elements;<br>Type B: epidermotropic                                        | CD4+ cells in types A and C;<br>CD8+ cells in types D and E;<br>CD8+ or CD4-CD8- in DUSP22-IRF4                                                     | TCR+ in most cases;<br>rare cases DUSP22-IRF4 rearranged | Excellent; usually a recurrent, self-healing disease; increased risk of developing lymphomas |

|                                                                                                       |                                                                                                        |                                                                                                 |                                                                                                                                                                                                                                                                                                                                                    |                                                                                                                                  |                                                 |                                                                                   |
|-------------------------------------------------------------------------------------------------------|--------------------------------------------------------------------------------------------------------|-------------------------------------------------------------------------------------------------|----------------------------------------------------------------------------------------------------------------------------------------------------------------------------------------------------------------------------------------------------------------------------------------------------------------------------------------------------|----------------------------------------------------------------------------------------------------------------------------------|-------------------------------------------------|-----------------------------------------------------------------------------------|
|                                                                                                       |                                                                                                        |                                                                                                 | infiltrate of CD30+ translocated<br>or CD30- small cells cases<br>simulating MF;<br>Type C: Sheets of<br>large CD30+ cells<br>with scarce<br>inflammation<br>simulating C-ALCL;<br>Type D:<br>epidermotropic<br>infiltrate of small to<br>medium CD8+<br>CD30+ cells;<br>Type E: angiocentric<br>pattern of small or<br>medium CD8+<br>CD30+ cells |                                                                                                                                  |                                                 |                                                                                   |
| <b>EBVMCU</b>                                                                                         | Circumscribed, No<br>often solitary<br>ulcer in the<br>setting of IS<br>(age-related or<br>iatrogenic) | (EBVMCU<br>may develop<br>even in<br>oropharynx<br>and GIT)                                     | Polymorphic<br>pattern with sparse<br>atypical large cells<br>with RSC features<br>(simulating cHL); or<br>monomorphic<br>pattern with sheets<br>of cells simulating<br>DLBCL                                                                                                                                                                      | CD30+<br>PAX5+<br>CD20<br>variably+<br>CD79a+<br>OCT2+<br>BOB1<br>variably+<br>MUM1+<br>CD15+(50%)<br>CD10-<br>BCL6-<br>EBER+    | IG clonality<br>(50%)<br><br>TCR<br>oligoclonal | Favorable<br>with<br>regression<br>upon<br>reduction or<br>removal of IS<br>cause |
| <b>Primary<br/>cutaneous<br/>CD8+<br/>aggressive<br/>epid.<br/>cytotoxic T-<br/>cell<br/>lymphoma</b> | Generalized<br>skin lesions<br>(ulcerated<br>plaques or<br>tumors)                                     | Visceral sites<br>(lungs, testes,<br>CNS, oral<br>mucosa),<br>lymph nodes<br>rarely<br>affected | Marked pagetoid<br>epidermotropic<br>growth; cells of<br>variable size;<br>angiocentricity and<br>angioinvasion<br>common                                                                                                                                                                                                                          | CD3+ CD8+<br>CD4-<br>beta F1+<br>Granz.B+<br>perforin+<br>TIA1+<br>CD7+/-<br>CD5- CD2-<br>CD30- often<br>EBER-                   | TCR+                                            | Poor                                                                              |
| <b>PCGD-TCL</b>                                                                                       | Generalized<br>skin lesions<br>(patches,<br>plaques,<br>tumors, often<br>in the<br>extremities)        | Extranodal<br>sites often;<br>rare in lymph<br>nodes, spleen<br>and BM                          | Three major<br>patterns:<br>lymph-epidermotropic<br>-dermal<br>-subcutaneous<br>(often more than<br>one pattern is<br>present); cells of<br>variable size                                                                                                                                                                                          | TCR-gamma+<br>Beta F1-<br>CD3+ CD2+<br>CD4- CD8-<br>(rarely CD8+)<br>CD5- CD7+/-<br>CD56+<br>Granz.+ TIA1+<br>perforin+<br>EBER- | TCR gamma+<br>TCR delta+<br>TCR beta-           | Poor                                                                              |

|                                                       |                                                                                     |    |                                                                                                                                         |                                                                                                                                                                                 |            |                                                           |
|-------------------------------------------------------|-------------------------------------------------------------------------------------|----|-----------------------------------------------------------------------------------------------------------------------------------------|---------------------------------------------------------------------------------------------------------------------------------------------------------------------------------|------------|-----------------------------------------------------------|
| <b>Primary cutaneous acral CD8+ T-cell lymphoma</b>   | Isolated reddish papule or nodule; ear (most frequent); nose, foot                  | No | Dense, monotonous dermal and hypodermal infiltrate of medium sized cells; epidermis spared                                              | CD3+ CD8+ TIA1+ beta F1+ TIA1+ (dot staining) CD4-; CD2+ CD5+ CD7+ (more often); Granz.B- and perforin- (often); CD56- CD57- TdT- CD30- CD10- BCL6- PD1- CXCL13- Ki67 low EBER- | TCR gamma+ | Good; remission of surgery or radiotherapy; no need of CT |
| <b>Primary cutaneous CD4+ small/medium T-cell LPD</b> | Slow- growing solitary plaque or nodule; face, neck or upper trunk often No patches | No | Dense nodular dermal and hypodermal infiltrate with absent or focal epidermotropism; prevalence of small/medium cells; large cells <30% | CD3+ CD4+ PD1+ BCL6+/- CXCL13+ CD10- CD8- CD30- CD7- loss of T-cell antigen rare; TIA1- Granz-B- perforin- Ki67 low                                                             | TCR+       | Excellent; intralesional steroid, surgery or radiotherapy |

**Legends:** BM: bone marrow; C-ALCL: cutaneous anaplastic large cell lymphoma; CT: chemotherapy; DLBCL: diffuse large B-cell lymphoma; EBVMCU: EBV-positive mucocutaneous ulcer; epid: epidermotropic; Granz: granzyme B; IHC: immunohistochemistry; IS: immunosuppression; LPD: lymphoproliferative disorder; LyP: lymphomatoid papulosis; MF: mycosis fungoides; PCGD-TCL: primary cutaneous gamma delta T-cell lymphoma; RSC: Reed-Sternberg cell
